# Supplementary material
Source: HighWire-hosted journal article supplement (https://bmjopenquality.bmj.com/highwire/filestream/136168/field_highwire_adjunct_files/0/ds2270.docx)
Supplement: ds2270.docx [file ds2270.docx]

**Calculating a two-level Wells’ Score**

| Clinical Feature | Points |
| --- | --- |
| Active Cancer (Treatment ongoing, within 6 months or palliative) | 1 |
| Paralysis, paresis or recent plaster immobilisation of the lower extremities | 1 |
| Recently bedridden for 3 or more days | 1 |
| Major surgery within 12 weeks requiring general or regional anaesthesia | 1 |
| Localised tenderness along the distribution of the deep venous system | 1 |
| Entire leg swollen | 1 |
| Calf swelling at least 3cm > asymptomatic side | 1 |
| Pitting oedema confined to the symptomatic leg | 1 |
| Dilated collateral superficial veins | 1 |
| Previous DVT | 1 |
| An alternative diagnosis is at least as likely as DVT | -2 |
| **Total** | ____ |
| **Wells’ Score ≤1:** *DVT Unlikely* |  |
| **Wells’ Score ≥2:** *DVT Likely* |  |
